# Supplementary material for: A LASSO-derived clinical score to predict severe acute kidney injury in the cardiac surgery recovery unit: a large retrospective cohort study using the MIMIC database
Source: HighWire-hosted journal article supplement (doi:10.1136/bmjopen-2021-060258), 2022-06-01
Supplement: bmjopen-2021-060258supp001_data_supplement.pdf [file bmjopen-2021-060258supp001_data_supplement.pdf]

## Supplementary tables

**Supplementary Table 1 Performance evaluation of the model without urine output.**

|                               | AUC<br>(95% CI)            | Accuracy<br>(95% CI)       | Sensitivity | Specificity | Positive<br>predictive<br>value | Negative<br>predictive<br>value | Cutoff<br>value | Cutoff<br>score |
|-------------------------------|----------------------------|----------------------------|-------------|-------------|---------------------------------|---------------------------------|-----------------|-----------------|
| Primary cohort<br>(n=4388)    | 0.713<br>(0.698-<br>0.728) | 0.658<br>(0.644-<br>0.672) | 0.594       | 0.739       | 0.743                           | 0.590                           | 0.363           | 97.2            |
| Validation cohort<br>(n=1883) | 0.718<br>(0.695-<br>0.741) | 0.666<br>(0.644-<br>0.687) | 0.712       | 0.610       | 0.683                           | 0.642                           | 0.095           | 94.1            |

AUC, area under the receiver operating characteristic curve; CI, confidence interval.

**Supplementary Table 2 Model performance in patients without suffering AKI in the initial 24 hours.**

|                              | AUC<br>(95% CI)            | Accuracy<br>(95% CI)       | Sensitivity | Specificity | Positive<br>predictive<br>value | Negative<br>predictive<br>value | Cutoff<br>value | Cutoff<br>score |
|------------------------------|----------------------------|----------------------------|-------------|-------------|---------------------------------|---------------------------------|-----------------|-----------------|
| Primary cohort<br>(n=1800)   | 0.680<br>(0.651-<br>0.709) | 0.704<br>(0.682-<br>0.725) | 0.538       | 0.757       | 0.412                           | 0.838                           | -0.943          | 149.6           |
| Validation cohort<br>(n=820) | 0.673<br>(0.630-<br>0.715) | 0.637<br>(0.603-<br>0.670) | 0.624       | 0.641       | 0.343                           | 0.850                           | -1.124          | 147.4           |

AUC, area under the receiver operating characteristic curve; CI, confidence interval.
